# Supplementary material for: Poor Prognostic Implication of ASXL1 Mutations in Korean Patients With Chronic Myelomonocytic Leukemia
Source: PubMed Central journal article supplement — Ann Lab Med. 2018 Jul 18;38(6):495–502. doi: 10.3343/alm.2018.38.6.495 (PMC6056400; doi:10.3343/alm.2018.38.6.495), 2018-07-18
Supplement: alm-38-495-s001.pdf [file alm-38-495-s001.pdf]

**Supplemental Data Table S1.** Detailed clinical and laboratory features of 36 patients with CMML

| No. Case | Age | Sex | ASXL1 mutation                    | Karyotype                        | 2008 WHO subtypes | 2016 WHO subtypes | FAB subtype        | Spanish cytogenetic risk stratification | MDAPS          | GFM model    | Mayo prognostic model | Mayo molecular model | Outcome |
|----------|-----|-----|-----------------------------------|----------------------------------|-------------------|-------------------|--------------------|-----------------------------------------|----------------|--------------|-----------------------|----------------------|---------|
| 1        | 73  | M   | c.1934dupG (p.Gly646Trpfs*12)     | 46,XY[20]                        | CMML-1            | CMML-0            | Proliferative type | Low                                     | Intermediate-1 | High         | Intermediate          | Intermediate-2       | Dead    |
| 2        | 71  | F   | c.1934dupG (p.Gly646Trpfs*12)     | 46,XX[4]                         | CMML-1            | CMML-1            | Proliferative type | Low                                     | Intermediate-1 | High         | High                  | High                 | Dead    |
| 3        | 66  | M   | c.1934dupG (p.Gly646Trpfs*12)     | 46,XY[2]                         | CMML-1            | CMML-1            | Proliferative type | Low                                     | Intermediate-2 | High         | High                  | High                 | Dead    |
| 4        | 55  | F   | c.2973_2985del (p.Leu992Valfs*28) | 46,XX[20]                        | CMML-1            | CMML-1            | Proliferative type | Low                                     | Intermediate-2 | Intermediate | Intermediate          | Intermediate-2       | Dead    |
| 5        | 50  | F   | -                                 | 46,XX,del(9)(q13q22)[2]/46,XX[3] | CMML-2            | CMML-2            | Dysplastic type    | High                                    | Intermediate-1 | Low          | High                  | Intermediate-2       | Dead    |
| 6        | 83  | M   | -                                 | 46,X,der(Y)(Y:1)(q12;q21)[20]    | CMML-1            | CMML-0            | Proliferative type | Intermediate                            | Low            | Intermediate | Intermediate          | Intermediate-1       | Dead    |
| 7        | 58  | M   | c.1934dupG (p.Gly646Trpfs*12)     | 46,XY,del(7)(q22)[9]             | CMML-1            | CMML-1            | Proliferative type | High                                    | Intermediate-2 | Intermediate | High                  | High                 | Dead    |
| 8        | 73  | M   | -                                 | 46,XY[20]                        | CMML-1            | CMML-0            | Dysplastic type    | Low                                     | Intermediate-1 | Intermediate | High                  | High                 | Dead    |
| 9        | 53  | M   | -                                 | 47,XY,+8[2]/46,XY[28]            | CMML-1            | CMML-0            | Proliferative type | High                                    | Intermediate-2 | Intermediate | High                  | High                 | Dead    |
| 10       | 38  | F   | c.1934dupG (p.Gly646Trpfs*12)     | 46,XX[20]                        | CMML-1            | CMML-1            | Dysplastic type    | Low                                     | Low            | Low          | Intermediate          | Intermediate-2       | Dead    |
| 11       | 71  | M   | -                                 | 45,X,-Y[50]                      | CMML-1            | CMML-0            | Dysplastic type    | Low                                     | Low            | Intermediate | High                  | Intermediate-2       | Dead    |
| 12       | 74  | M   | -                                 | 46,XY[20]                        | CMML-1            | CMML-1            | Proliferative type | Low                                     | Intermediate-1 | Intermediate | High                  | Intermediate-2       | Dead    |
| 13       | 72  | M   | -                                 | 46,XY[20]                        | CMML-1            | CMML-0            | Dysplastic type    | Low                                     | Intermediate-1 | Low          | Intermediate          | Intermediate-1       | Alive   |
| 14       | 74  | M   | c.1934dupG (p.Gly646Trpfs*12)     | 46,XY[20]                        | CMML-1            | CMML-1            | Proliferative type | Low                                     | Intermediate-2 | Intermediate | High                  | High                 | Dead    |
| 15       | 58  | M   | -                                 | 46,XY[20]                        | CMML-1            | CMML-0            | Proliferative type | Low                                     | Intermediate-1 | Low          | High                  | High                 | Dead    |
| 16       | 78  | M   | -                                 | 46,XY[20]                        | CMML-1            | CMML-0            | Proliferative type | Low                                     | Intermediate-1 | Intermediate | High                  | Intermediate-2       | Alive   |
| 17       | 68  | M   | c.3001dupA (p.Thr1001Asnfs*4)     | 46,XY[20]                        | CMML-1            | CMML-0            | Proliferative type | Low                                     | Low            | Intermediate | Intermediate          | Intermediate-2       | Dead    |
| 18       | 56  | F   | -                                 | 46,XX[20]                        | CMML-1            | CMML-0            | Proliferative type | Low                                     | Low            | Intermediate | Intermediate          | Intermediate-1       | Alive   |
| 19       | 70  | M   | -                                 | 46,XY[20]                        | CMML-1            | CMML-1            | Dysplastic type    | Low                                     | Intermediate-2 | Intermediate | High                  | Intermediate-2       | Alive   |
| 20       | 55  | M   | c.1900_1922del (p.Glu635Argfs*15) | 47,XY,+21[19]/46,XY[1]           | CMML-1            | CMML-1            | Proliferative type | High                                    | Intermediate-2 | Intermediate | High                  | High                 | Dead    |
| 21       | 59  | F   | -                                 | 46,XX[20]                        | CMML-2            | CMML-2            | Proliferative type | Low                                     | High           | Intermediate | High                  | Intermediate-2       | Alive   |

(Continued to the next page)

Supplemental Data Table S1. Continued

| No. Case | Age | Sex | ASXL1 mutation                        | Karyotype                                              | 2008 WHO subtypes | 2016 WHO subtypes | FAB subtype        | Spanish cytogenetic risk stratification | MDAPS          | GFM model    | Mayo prognostic model | Mayo molecular model | Outcome |
|----------|-----|-----|---------------------------------------|--------------------------------------------------------|-------------------|-------------------|--------------------|-----------------------------------------|----------------|--------------|-----------------------|----------------------|---------|
| 22       | 83  | M   | -                                     | 45,X,-Y[12]                                            | CMML-2            | CMML-2            | Dysplastic type    | Low                                     | Low            | Low          | High                  | Intermediate-2       | Alive   |
| 23       | 72  | M   | c.1773C>G (p.Tyr591*)                 | 46,XY[20]                                              | CMML-2            | CMML-2            | Proliferative type | Low                                     | High           | High         | High                  | High                 | Dead    |
| 24       | 60  | F   | -                                     | 46,XX[20]                                              | CMML-2            | CMML-2            | Proliferative type | Low                                     | High           | Intermediate | High                  | High                 | Dead    |
| 25       | 76  | M   | c.1934dupG (p.Gly646Trpfs*12)         | 45,XY,-7[10]/46,XY[10]                                 | CMML-2            | CMML-2            | Proliferative type | High                                    | High           | High         | High                  | High                 | Dead    |
| 26       | 75  | F   | c.1934dupG (p.Gly646Trpfs*12)         | 46,XX[20]                                              | CMML-2            | CMML-2            | Proliferative type | Low                                     | High           | High         | High                  | High                 | Dead    |
| 27       | 72  | F   | -                                     | 46,XX[20]                                              | CMML-2            | CMML-2            | Proliferative type | Low                                     | Intermediate-2 | Intermediate | High                  | Intermediate-2       | Alive   |
| 28       | 75  | M   | c.1766_1767insAGTA (p.Thr590Valfs*30) | 46,XY[20]                                              | CMML-2            | CMML-2            | Dysplastic type    | Low                                     | Low            | Intermediate | Intermediate          | Intermediate-2       | Alive   |
| 29       | 79  | M   | c.1934dupG (p.Gly646Trpfs*12)         | 46,XY[20]                                              | CMML-2            | CMML-2            | Proliferative type | Low                                     | Intermediate-2 | High         | High                  | High                 | Dead    |
| 30       | 59  | M   | c.1934dupG (p.Gly646Trpfs*12)         | 46,XY[20]                                              | CMML-2            | CMML-2            | Proliferative type | Low                                     | High           | High         | High                  | High                 | Alive   |
| 31       | 75  | M   | -                                     | 45,XY,del(3)(p21),der(5;6)(p10;p10),add(15)(p11.2)[20] | CMML-2            | CMML-2            | Dysplastic type    | High                                    | High           | Intermediate | High                  | High                 | Dead    |
| 32       | 70  | M   | c.2254dupG (p.Ala752Glyfs*22)         | 46,XY[20]                                              | CMML-2            | CMML-2            | Dysplastic type    | Low                                     | Low            | Intermediate | Intermediate          | Intermediate-2       | Alive   |
| 33       | 75  | M   | c.1934dupG (p.Gly646Trpfs*12)         | 46,XY[18]                                              | CMML-2            | CMML-2            | Proliferative type | Low                                     | Intermediate-2 | High         | High                  | High                 | Dead    |
| 34       | 65  | M   | c.1934dupG (p.Gly646Trpfs*12)         | 47,XY,+8[20]                                           | CMML-1            | CMML-0            | Proliferative type | High                                    | Intermediate-2 | Intermediate | High                  | High                 | Dead    |
| 35       | 74  | M   | -                                     | 46,XY[20]                                              | CMML-1            | CMML-0            | Proliferative type | Low                                     | Intermediate-1 | Intermediate | High                  | High                 | Dead    |
| 36       | 72  | F   | -                                     | 46,XX[10]                                              | CMML-2            | CMML-2            | Proliferative type | Low                                     | High           | High         | High                  | High                 | Dead    |

Abbreviations: FAB, French-American-British; MDAPS, MD Anderson prognostic scoring system; GFM, Groupe Français des Myélodysplasies; M, male; F, female; CMML, chronic myelomonocytic leukemia.
