# Supplementary material for: Poor Prognostic Implication of ASXL1 Mutations in Korean Patients With Chronic Myelomonocytic Leukemia
Source: PubMed Central journal article supplement — Ann Lab Med. 2018 Jul 18;38(6):495–502. doi: 10.3343/alm.2018.38.6.495 (PMC6056400; doi:10.3343/alm.2018.38.6.495), 2018-07-18
Supplement: alm-38-495-s002.pdf [file alm-38-495-s002.pdf]

**Supplemental Data Table S2.** PCR and sequencing primers for the *ASXL1* gene

| Primer name | Forward sequence (5'→3') | Reverse sequence (3'→5') | Product size (bp) |
|-------------|--------------------------|--------------------------|-------------------|
| ASXL1_E14-1 | tgccatgacccttaagctact    | AAGGCGGCAGTAGTTGTGTT     | 479               |
| ASXL1_E14-2 | GATGAGGGAGGTGGCAGAG      | TCCCACTAGAGACGGAATGG     | 492               |
| ASXL1_E14-3 | TCCTCCCAAACCTCAGTAGC     | CTGGTTGGGCTGTTTCACT      | 445               |
| ASXL1_E14-4 | GCCTGCAGAACAGAGCATT      | GTGTCAGCCTCACTGCTGTC     | 487               |
| ASXL1_E14-5 | TGTCAACAGGTGGACATTGAA    | TGGTACTTGTGGGATTCTGA     | 489               |
| ASXL1_E14-6 | CTCAGTGGAGGCCACTAACC     | GATCTCCTGGGCTTTTCCT      | 500               |
| ASXL1_E14-7 | AGAGCAGTTCTTCTTTAGTTG    | AGTGACCCACCAGTCCAG       | 500               |
| ASXL1_E14-8 | GTTGGGACCAAGCACAAACT     | ACACTGGAGCGAGATGCTTT     | 508               |
| ASXL1_E14-9 | CTTCTCTCCCCTCCCAACTC     | gcaagagtgcctcctcctaa     | 462               |

Uppercase letters and lowercase letters represent exonic and intronic sequences, respectively.
